# Supplementary material
Source: MDPI journal article supplement (https://www.mdpi.com/2076-3417/13/8/4933)
Supplement: s1 [file s1]

## Supplementary Materials

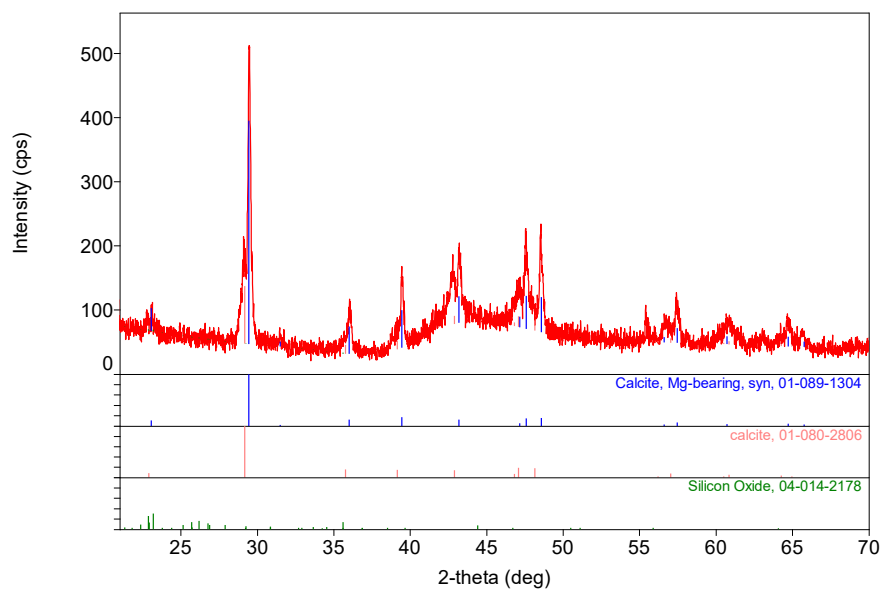

**Figure S1.** XRD qualitative phase analysis of the mortar support, with displayed PDF cards peak bars (PDXL 2 software).

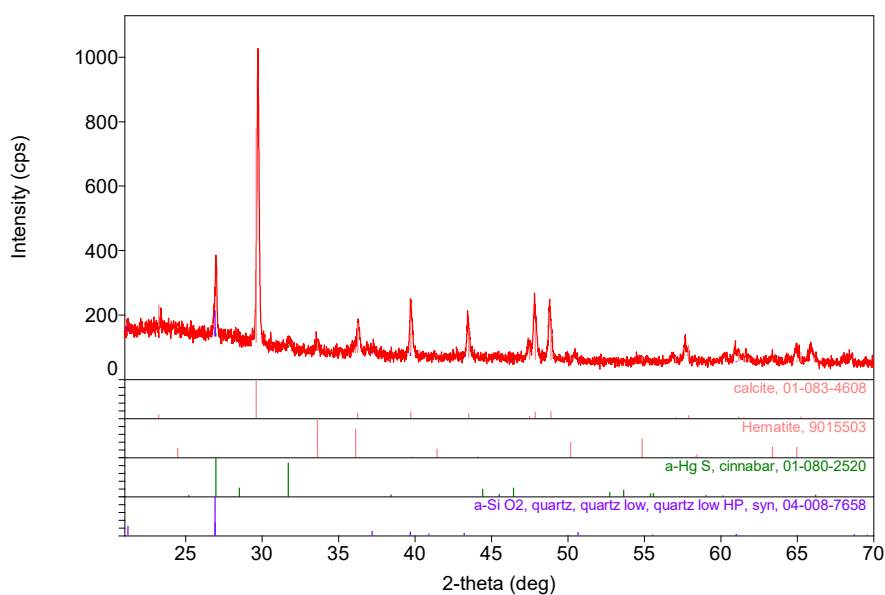

**Figure S2.** XRD qualitative phase analysis of the pictorial layer, with displayed PDF cards peak bars (PDXL 2 software).
